# Supplementary material for: Exploring SnxTi1−xO2 Solid Solutions Grown onto Graphene Oxide (GO) as Selective Toluene Gas Sensors
Source: PubMed Central journal article supplement (PMC7221561; doi:10.3390/nano10040761), 2020-04-15
Supplement: nanomaterials-10-00761-s001.pdf [file nanomaterials-10-00761-s001.pdf]

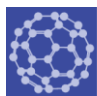

## Supplementary Information

Exploring  $\text{Sn}_x\text{Ti}_{1-x}\text{O}_2$  Solid Solutions Grown onto Graphene Oxide (GO) as Selective Toluene Gas Sensors

Eleonora Pargoletti <sup>1,2,\*</sup>, Simone Verga <sup>1</sup>, Gian Luca Chiarello <sup>1</sup>, Mariangela Longhi <sup>1,2</sup>,  
Giuseppina Cerrato <sup>2,3</sup>, Alessia Giordana <sup>2,3</sup> and Giuseppe Cappelletti <sup>1,2,\*</sup>

<sup>1</sup> Dipartimento di Chimica, Università degli Studi di Milano, Via Golgi 19, 20133 Milan, Italy; simone.verga@studenti.unimi.it (S.V.); gianluca.chiarello@unimi.it (G.L.C.); mariangela.longhi@unimi.it (M.L.)

<sup>2</sup> Consorzio Interuniversitario per la Scienza e Tecnologia dei Materiali (INSTM), Via Giusti 9, 50121 Firenze, Italy; giuseppina.cerrato@unito.it (G.C.); alessia.giordana@unito.it (A.G.)

<sup>3</sup> Dipartimento di Chimica & NIS, Università degli Studi di Torino, Via P. Giuria 7, 10125 Turin, Italy

\* Correspondence: eleonora.pargoletti@unimi.it (E.P.); giuseppe.cappelletti@unimi.it (G.C.); Tel.: +39-02-50314228 (G.C.)

**Table S1.** Binding Energies (B. E.) relative to different Sn and Ti oxidation states, and ratios between counts of each peak and the total counts, for 32:1  $\text{SnO}_2/\text{GO}$ , 32:1  $\text{Sn}_{0.71}\text{Ti}_{0.29}\text{O}_2/\text{GO}$ , 32:1  $\text{Sn}_{0.55}\text{Ti}_{0.45}\text{O}_2/\text{GO}$ , 32:1  $\text{Sn}_{0.21}\text{Ti}_{0.79}\text{O}_2/\text{GO}$  and 32:1  $\text{TiO}_2/\text{GO}$  representative samples.

| Atom                   | 32:1<br>$\text{SnO}_2/\text{GO}$ |           | 32:1<br>$\text{Sn}_{0.71}\text{Ti}_{0.29}\text{O}_2/\text{G}$ |           | 32:1<br>$\text{Sn}_{0.55}\text{Ti}_{0.45}\text{O}_2/\text{G}$ |           | 32:1<br>$\text{Sn}_{0.21}\text{Ti}_{0.79}\text{O}_2/\text{G}$ |           | 32:1<br>$\text{TiO}_2/\text{GO}$ |           |
|------------------------|----------------------------------|-----------|---------------------------------------------------------------|-----------|---------------------------------------------------------------|-----------|---------------------------------------------------------------|-----------|----------------------------------|-----------|
|                        | B. E.<br>(eV)                    | Rati<br>o | B. E.<br>(eV)                                                 | Rati<br>o | B. E.<br>(eV)                                                 | Rati<br>o | B. E.<br>(eV)                                                 | Rati<br>o | B. E.<br>(eV)                    | Rati<br>o |
| Sn(II)                 | –                                | –         | 485.3                                                         | 0.38      | 484.9                                                         | 0.12      | 484.2                                                         | 0.33      | –                                | –         |
| Sn(III)                | –                                | –         | 486.8                                                         | 0.42      | 486.1                                                         | 0.56      | 486.1                                                         | 0.57      | –                                | –         |
| Sn(IV)                 | 486.9                            | 1.00      | 488.5                                                         | 0.30      | 487.5                                                         | 0.32      | 487.5                                                         | 0.10      | –                                | –         |
| Ti(III)                | –                                | –         | 457.5                                                         | 0.40      | 457.3                                                         | 0.36      | 456.4                                                         | 0.32      | 457.3                            | 0.33      |
| Ti(IV)                 | –                                | –         | 459.4                                                         | 0.36      | 458.6                                                         | 0.44      | 458.0                                                         | 0.32      | 458.3                            | 0.51      |
| Ti(IV+ $\delta$ )<br>+ | –                                | –         | 460.9                                                         | 0.24      | 460.2                                                         | 0.20      | 459.1                                                         | 0.36      | 459.6                            | 0.16      |

**Table S2.** Response ( $t_{res}$ ) and recovery ( $t_{rec}$ ) times relative to 1 ppm of (a) toluene and (b) acetone molecules, obtained at 350 °C, without UV light, in simulated air (20% O<sub>2</sub> – 80% N<sub>2</sub>).

(a)

| Sensor                                                        | $t_{res}$ (s) | $t_{rec}$ (s) |
|---------------------------------------------------------------|---------------|---------------|
| 32:1 SnO <sub>2</sub> /GO                                     | 20            | 30            |
| 32:1 Sn <sub>0.71</sub> Ti <sub>0.29</sub> O <sub>2</sub> /GO | 50            | 55            |
| 32:1 Sn <sub>0.55</sub> Ti <sub>0.45</sub> O <sub>2</sub> /GO | 36            | 65            |
| 32:1 Sn <sub>0.44</sub> Ti <sub>0.56</sub> O <sub>2</sub> /GO | –             | –             |
| 32:1 Sn <sub>0.35</sub> Ti <sub>0.65</sub> O <sub>2</sub> /GO | 55            | 60            |
| 32:1 Sn <sub>0.21</sub> Ti <sub>0.79</sub> O <sub>2</sub> /GO | 100           | 50            |
| 32:1 TiO <sub>2</sub> /GO                                     | 25            | 30            |

(b)

| Sensor                                                        | $t_{res}$ (s) | $t_{rec}$ (s) |
|---------------------------------------------------------------|---------------|---------------|
| 32:1 SnO <sub>2</sub> /GO                                     | 65            | 70            |
| 32:1 Sn <sub>0.55</sub> Ti <sub>0.45</sub> O <sub>2</sub> /GO | 30            | 50            |
| 32:1 TiO <sub>2</sub> /GO                                     | 20            | 30            |

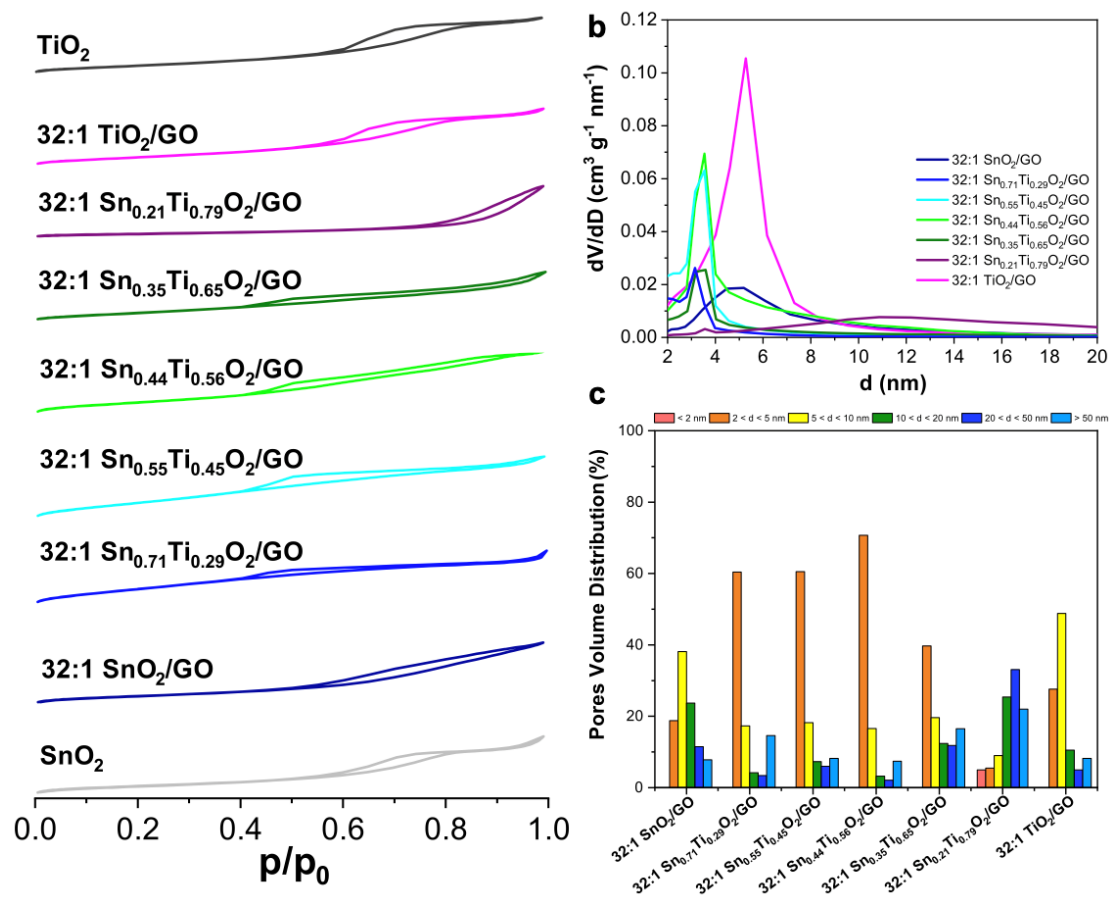

**Figure S1.** (a) Comparison of BET isotherms from pure cassiterite  $\text{SnO}_2$ , 32:1  $\text{SnO}_2/\text{GO}$  to 32:1  $\text{TiO}_2/\text{GO}$ , pure anatase  $\text{TiO}_2$ . (b,c) Pores size distribution by BET-BJH analysis for all the solid solutions.

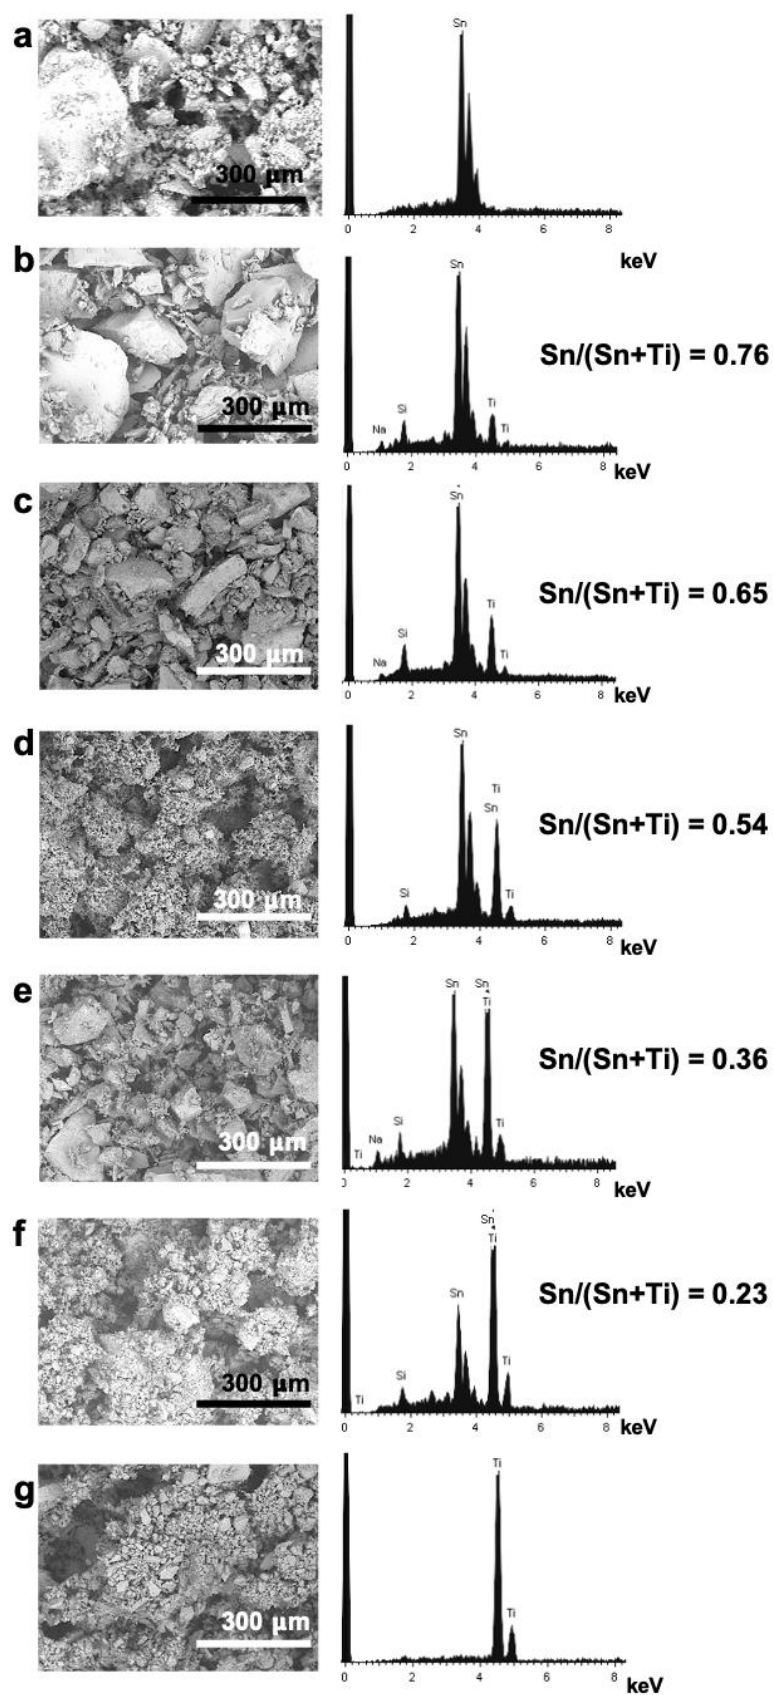

**Figure S2.** SEM images alongside with the relative EDX spectra of (a) 32:1 SnO<sub>2</sub>/GO, (b) 32:1 Sn<sub>0.71</sub>Ti<sub>0.29</sub>O<sub>2</sub>/GO, (c) 32:1 Sn<sub>0.55</sub>Ti<sub>0.45</sub>O<sub>2</sub>/GO, (d) 32:1 Sn<sub>0.44</sub>Ti<sub>0.56</sub>O<sub>2</sub>/GO, (e) 32:1 Sn<sub>0.35</sub>Ti<sub>0.65</sub>O<sub>2</sub>/GO, (f) 32:1 Sn<sub>0.21</sub>Ti<sub>0.79</sub>O<sub>2</sub>/GO, (g) 32:1 TiO<sub>2</sub>/GO. The molar ratios Sn/(Sn+Ti) by EDX analysis have been reported, accordingly.

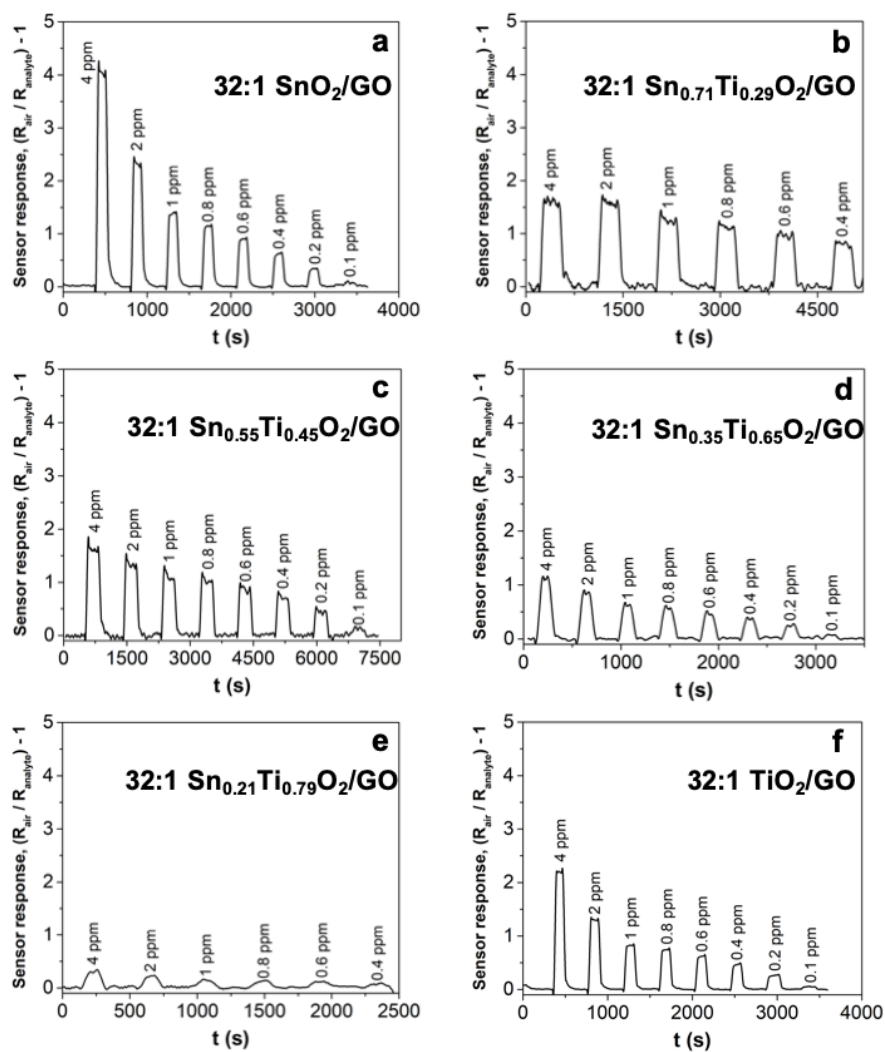

**Figure S3.** Toluene sensing by (a) 32:1 SnO<sub>2</sub>/GO, (b–e) mixed oxides (with the exception of 32:1 Sn<sub>0.44</sub>Ti<sub>0.56</sub>O<sub>2</sub>/GO, since it did not show any signal), and (f) 32:1 TiO<sub>2</sub>/GO compounds. Tests were performed at 350 °C, without UV light, in simulated air (20% O<sub>2</sub> – 80% N<sub>2</sub>).
